# Supplementary material for: Açai Seeds (Euterpe oleracea Mart) Are Agroindustrial Waste with High Potential to Produce Low-Cost Substrates after Acid Hydrolysis
Source: MDPI journal article supplement (doi:10.3390/molecules28186661), 2023-09-16

**SUPPLEMENTARY MATERIAL**

**Açaí Seeds (*Euterpe oleracea* Mart) are Agroindustrial Wastes with High Potential to Produce  
Low-Cost Substrates after Acid Hydrolysis**

***Willen Silva Igreja<sup>a</sup>, Luiza Helena da Silva Martins<sup>a,b</sup>, Rafaela Rodrigues de Almeida<sup>c</sup>, Johnatt***

***Allan Rocha de Oliveira<sup>a,d</sup>, Alessandra Santos Lopes<sup>a,c</sup>, Renan Campos Chisté<sup>a,c,\*</sup>***

*<sup>a</sup>Graduate Program in Food Science and Technology, Institute of Technology (ITEC), Federal University of Pará (UFPA), 66075-110, Belém, Pará, Brazil.*

*<sup>b</sup>Instituto de Saúde e Produção Animal (ISPA), Universidade Federal Rural da Amazônia (UFRA), 66077-830, Belém, Pará, Brazil.*

*<sup>c</sup>School of Food Engineering (FEA), Institute of Technology (ITEC), Federal University of Pará (UFPA), 66075-110, Belém, Pará, Brazil.*

*<sup>d</sup>Nutrition College, Federal University of Pará (UFPA), Belem 66110-072, PA, Brazil.*

Luiza Helena da Silva Martins – ORCID 0000-0003-1911-4502

Johnatt Allan Rocha de Oliveira - ORCID 0000-0002-1778-3043

Alessandra Santos Lopes – ORCID 0000-0002-8584-5859

Renan Campos Chisté – ORCID 0000-0002-4549-3297

---

\*Corresponding author: rcchiste@ufpa.br (Ph.D Renan Campos Chisté).  
Faculdade de Engenharia de Alimentos (FEA), Instituto de Tecnologia (ITEC), Universidade Federal do Pará (UFPA). Rua Augusto Corrêa, 01, Guamá, CEP: 66075-110, Belém, Pará, Brasil.

**Supplementary Table 1.** Total reducing sugars (TRS) and Combined Severity Factor (CSF) obtained during the Central Composite Rotational Design (CCRD) runs for the acid hydrolysis of açai seeds using phosphoric acid ( $\text{H}_3\text{PO}_4$ ).

| Level of independent variables |           |              |             | Dependent variable      |           |
|--------------------------------|-----------|--------------|-------------|-------------------------|-----------|
| Runs                           | $X_1$     | $X_2$        | $X_3$       | $\text{H}_3\text{PO}_4$ |           |
|                                |           |              |             | CSF                     | TSR (g/L) |
| 1                              | 1 (-1)    | 30 (-1)      | 5 (-1)      | 0.96                    | 2.93      |
| 2                              | 4 (+1)    | 30 (-1)      | 5 (-1)      | 1.12                    | 3.93      |
| 3                              | 1 (-1)    | 90 (+1)      | 5 (-1)      | 1.43                    | 4.59      |
| 4                              | 4 (+1)    | 90 (+1)      | 5 (-1)      | 1.59                    | 7.13      |
| 5                              | 1 (-1)    | 30 (-1)      | 20 (+1)     | 0.96                    | 11.92     |
| 6                              | 4 (+1)    | 30 (-1)      | 20 (+1)     | 1.12                    | 15.32     |
| 7                              | 1 (-1)    | 90 (+1)      | 20 (+1)     | 1.43                    | 22.13     |
| 8                              | 4 (+1)    | 90 (+1)      | 20 (+1)     | 1.59                    | 33.97     |
| 9                              | 0 (-1.68) | 60 (0)       | 12.5 (0)    | NC                      | 9.62      |
| 10                             | 5 (+1.68) | 60 (0)       | 12.5 (0)    | 1.48                    | 30.07     |
| 11                             | 2.5 (0)   | 9.54 (-1.68) | 12.5 (0)    | 0.55                    | 11.04     |
| 12                             | 2.5 (0)   | 110 (+1.68)  | 12.5 (0)    | 1.61                    | 22.77     |
| 13                             | 2.5 (0)   | 60 (0)       | 0.1 (-1.68) | 1.35                    | < LOD     |
| 14                             | 2.5 (0)   | 60 (0)       | 25 (+1.68)  | 1.35                    | 29.51     |
| 15                             | 2.5 (0)   | 60 (0)       | 12.5 (0)    | 1.35                    | 20.00     |
| 16                             | 2.5 (0)   | 60 (0)       | 12.5 (0)    | 1.35                    | 22.19     |
| 17                             | 2.5 (0)   | 60 (0)       | 12.5 (0)    | 1.35                    | 21.29     |

$X_1$ : Acid concentration (% , w/v).  $X_2$ : Hydrolysis time (min).  $X_3$ : Solids concentration (% , w/v).

< LOD: below the limite of detection. NC: Combined Severity factor not calculated given the 0% diluted acid concentration.

**Supplementary Table 2.** t and p value at 90% confidence for the studied parameters in the experimental design.

| <b>Factor</b>                         | <b>t value</b><br><b>(TRS)</b> | <b>p value</b><br><b>(TRS)</b> | <b>t value</b><br><b>(HMF)</b> | <b>p value</b><br><b>(HMF)</b> | <b>t value</b><br><b>(Solubilized<br/>mas)</b> | <b>p value</b><br><b>(Solubilized<br/>mas)</b> |
|---------------------------------------|--------------------------------|--------------------------------|--------------------------------|--------------------------------|------------------------------------------------|------------------------------------------------|
| <b>Mean/Interaction</b>               | 171.6399                       | 0.000034                       | 92.8866                        | 0.000116                       | 82.2134                                        | 0.000148                                       |
| <b>X<sub>1</sub> (Linear)</b>         | 87.2050                        | 0.000131                       | 176.2357                       | 0.000032                       | 43.2951                                        | 0.000533                                       |
| <b>X<sub>1</sub> (Quadratic)</b>      | -39.2657                       | 0.000648                       | 13.7007                        | 0.005285                       | <b>-1.2569</b>                                 | <b>0.335682</b>                                |
| <b>X<sub>2</sub> (Linear)</b>         | 79.0235                        | 0.000160                       | 155.0748                       | 0.000042                       | 22.6748                                        | 0.001939                                       |
| <b>X<sub>2</sub>(Quadratic)</b>       | -19.8918                       | 0.002518                       | 32.6532                        | 0.000937                       | <b>1.4774</b>                                  | <b>0.277625</b>                                |
| <b>X<sub>3</sub>(Linear)</b>          | 160.2199                       | 0.000039                       | 118.1064                       | 0.000072                       | 14.9800                                        | 0.004427                                       |
| <b>X<sub>3</sub>(Quadratic)</b>       | -24.3874                       | 0.001677                       | -15.4188                       | 0.004180                       | -22.5319                                       | 0.001964                                       |
| <b>X<sub>1</sub> by X<sub>2</sub></b> | 14.9660                        | 0.004435                       | 114.0549                       | 0.000077                       | 5.3606                                         | 0.033082                                       |
| <b>X<sub>1</sub> by X<sub>3</sub></b> | 44.1388                        | 0.000513                       | 105.7494                       | 0.000089                       | 2.4573                                         | 0.133285                                       |
| <b>X<sub>2</sub> by X<sub>3</sub></b> | 44.9127                        | 0.000495                       | 80.6162                        | 0.000154                       | 3.0580                                         | 0.092360                                       |

**Supplementary Table 3** – ANOVA (10% significance) for the adequacy of the quadratic response surface models to determine the contents of total reducing sugars (TRS), hydroxymethylfurfural (HMF) and solubilized mass (SM) after acid hydrolysis of dried açai seeds with H<sub>2</sub>SO<sub>4</sub>.

| Variation source                                                                                                                                                                                                                                                               | Sum of squares | Degrees of freedom | Mean Square | F <sub>value</sub> | R <sup>2</sup> |
|--------------------------------------------------------------------------------------------------------------------------------------------------------------------------------------------------------------------------------------------------------------------------------|----------------|--------------------|-------------|--------------------|----------------|
| <b>TRS (g/L) = 47.83+11.47X<sub>1</sub>-5.73X<sub>1</sub><sup>2</sup>+10.37X<sub>2</sub>-2.88X<sub>2</sub><sup>2</sup>+21.10X<sub>3</sub>-3.58X<sub>3</sub><sup>2</sup>+2.56X<sub>1</sub>X<sub>2</sub>+7.55X<sub>1</sub>X<sub>3</sub>+7.69X<sub>2</sub>X<sub>3</sub></b>       |                |                    |             |                    |                |
| Regression                                                                                                                                                                                                                                                                     | 10659.8        | 9                  | 1184.4      | 20.11              | 0.96           |
| Residue                                                                                                                                                                                                                                                                        | 412.2          | 7                  | 58.9        |                    |                |
| Lack of fit                                                                                                                                                                                                                                                                    | 411.71         | 5                  | 82.343      | 351.09             |                |
| Pure error                                                                                                                                                                                                                                                                     | 0.47           | 2                  | 0.235       |                    |                |
| Total                                                                                                                                                                                                                                                                          | 11072.00       | 16                 |             |                    |                |
| <b>HMF (g/L) = 69.81+62.51X<sub>1</sub>+5.39X<sub>1</sub><sup>2</sup>+ 54.90X<sub>2</sub>+12.75X<sub>2</sub><sup>2</sup>+ 41.96X<sub>3</sub>-6.11X<sub>3</sub><sup>2</sup>+52.66X<sub>1</sub>X<sub>2</sub>+48.33X<sub>1</sub>X<sub>3</sub>+37.22X<sub>2</sub>X<sub>3</sub></b> |                |                    |             |                    |                |
| Regression                                                                                                                                                                                                                                                                     | 173051.3       | 9                  | 19227.70    | 6.92               | 0.89           |
| Residue                                                                                                                                                                                                                                                                        | 19452.5        | 7                  | 2779.07     |                    |                |
| Lack of fit                                                                                                                                                                                                                                                                    | 19449.1        | 5                  | 9.8863      | 2280.57            |                |
| Pure error                                                                                                                                                                                                                                                                     | 3.4            | 2                  | 2.9883      |                    |                |
| Total                                                                                                                                                                                                                                                                          | 192503.8       | 16                 |             |                    |                |
| <b>SM (%) = 36.08+9.14X<sub>1</sub>+ 4.77X<sub>2</sub>+3.17X<sub>3</sub>-5.32X<sub>3</sub><sup>2</sup>+1.47X<sub>1</sub>X<sub>2</sub>+0.84X<sub>2</sub>X<sub>3</sub></b>                                                                                                       |                |                    |             |                    |                |
| Regression                                                                                                                                                                                                                                                                     | 1955.5         | 9                  | 217.27      | 1.93               | 0.71           |
| Residue                                                                                                                                                                                                                                                                        | 786.4          | 7                  | 112.34      |                    |                |
| Lack of fit                                                                                                                                                                                                                                                                    | 785.2          | 5                  | 157.0       | 260.15             |                |
| Pure error                                                                                                                                                                                                                                                                     | 1.207          | 2                  | 0.604       |                    |                |
| Total                                                                                                                                                                                                                                                                          | 2741.8         | 16                 |             |                    |                |

F<sub>0.1; 9; 7</sub> = 2.72; F<sub>0.1; 5; 2</sub> = 9.29 (F = Tabulated value from Fisher test). The mathematical models were considered significant ( $p \leq 0.1$ ) when the regression F<sub>values</sub> were three times higher than F<sub>tabulated</sub> and as predicted when the lack of fit F<sub>values</sub> were lower than the F<sub>tabulated</sub> value.

**Supplementary Figure 1** – Profiles for the predicted values and desirability function used to predict the contents of total reducing sugars (TRS), hydroxymethyl furfural (HMF) and solubilized mass at the chosen best condition for the acid hydrolysis of dried açai seeds: with 3.5% H<sub>2</sub>SO<sub>4</sub> + 25% solids during 70 min in autoclave.

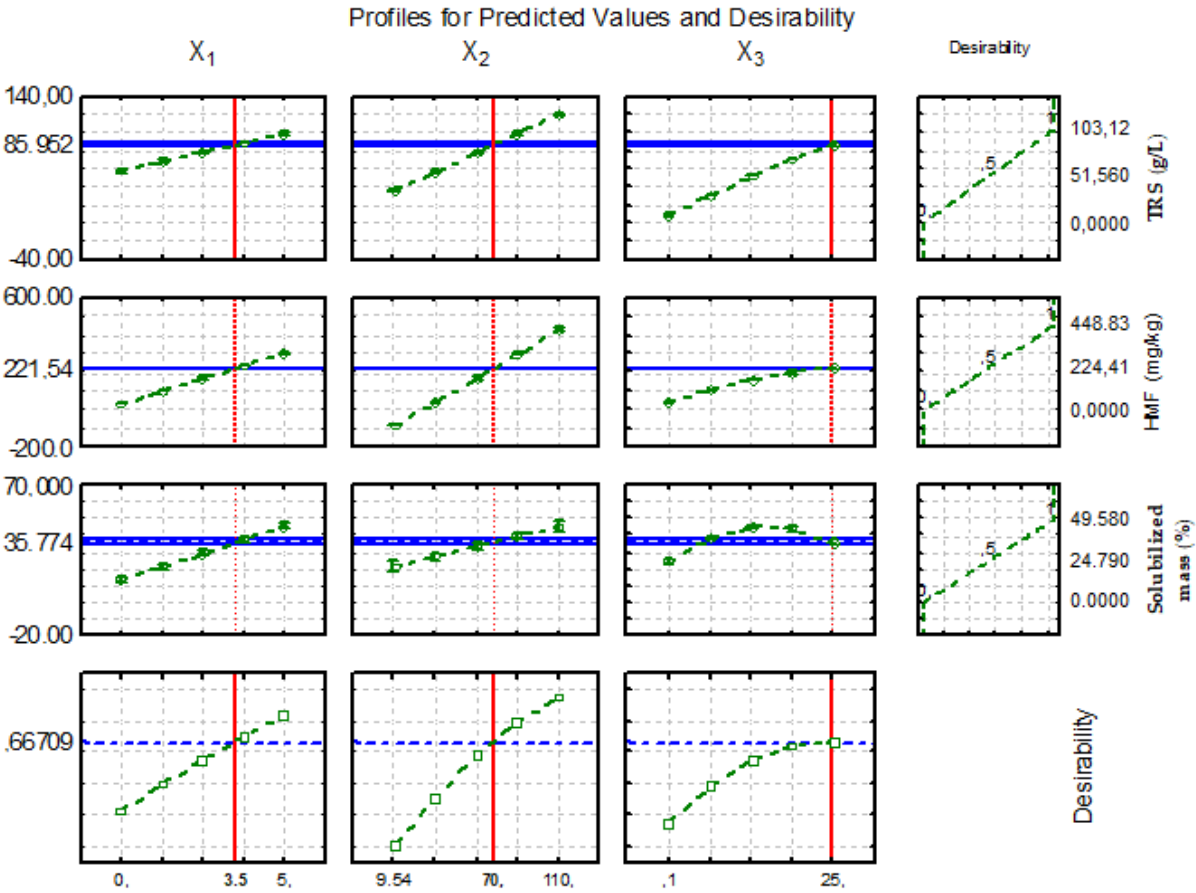

Supplement: s1 [file s1]
